# Supplementary material for: Structured inhibitory activity dynamics in new virtual environments
Source: eLife journal article supplement (doi:10.7554/elife.47611), 2019-10-08
Supplement: supp [file elife-47611-supp-v1.zip]

Archive with 29 entries (29 files):
- elife_poa_e47611_Figure_6_figure_supplement_1.tif
- elife_poa_e47611_Figure_2_figure_supplement_4.tif
- elife_poa_e47611_Figure_4_figure_supplement_2.tif
- elife_poa_e47611_Figure_1_figure_supplement_1.tif
- elife_poa_e47611_Supplementary_file_2.xlsx
- elife_poa_e47611_Supplementary_file_1.xlsx
- elife_poa_e47611_Figure_3_figure_supplement_3.tif
- elife_poa_e47611_Figure_6_figure_supplement_2.tif
- elife_poa_e47611_Supplementary_file_3.xlsx
- elife_poa_e47611_Supplementary_file_6.xlsx
- elife_poa_e47611_Supplementary_file_4.xlsx
- elife_poa_e47611_Figure_4_figure_supplement_4.tif
- elife_poa_e47611_Figure_1_figure_supplement_2.tif
- elife_poa_e47611_Figure_4_figure_supplement_3.tif
- elife_poa_e47611_Figure_4_figure_supplement_1.tif
- elife_poa_e47611_Figure_4_figure_supplement_6.tif
- elife_poa_e47611_Supplementary_file_5.xlsx
- elife_poa_e47611_Figure_2_figure_supplement_3.tif
- elife_poa_e47611_Figure_4_figure_supplement_5.tif
- elife_poa_e47611_Figure_5_figure_supplement_1.tif
- elife_poa_e47611_Figure_2_figure_supplement_2.tif
- elife_poa_e47611_Video_1.avi
- elife_poa_e47611_Figure_3_figure_supplement_2.tif
- elife_poa_e47611_Figure_3_figure_supplement_4.tif
- elife_poa_e47611_Figure_5_figure_supplement_2.tif
- elife_poa_e47611_Figure_3_figure_supplement_1.tif
- elife_poa_e47611_Figure_6_figure_supplement_3.tif
- elife_poa_e47611_Figure_2_figure_supplement_1.tif
- elife_poa_e47611_Transparent_Reporting_File.pdf
