# Supplementary material for: Structured inhibitory activity dynamics in new virtual environments
Source: eLife journal article supplement (doi:10.7554/elife.47611), 2019-10-08
Supplement: supp [file elife-47611-supp-v1.zip › elife_poa_e47611_Supplementary_file_1.xlsx]

## Sheet: Sheet1
	Figure 1
		Panel	Behavioral Metric	N	Test
						Comparison	d.f	test statistic	P - value	hedge's g
		C	Reward Rate	14	1 sample T-Test, Bonferroni-Holm Correction	Day 1	13	-8.34	0.000711	-2.23
						Day 2	13	-3.06	0.037	-0.817
						Day 3	13	-2.02	0.11	n.s.
						Day 4	13	-3	0.037	-0.8
						Day 5	13	-1.57	0.14	n.s.
						Comparison	d.f	test statistic	P - value	hedge's g
		D	Decel 3s prior to reward	14	Paired Sample T-Test, Bonferroni-Holm Correction	Day 1	13	5.1	0.001	2.01
						Day 2	13	3.44	0.016	1.5
						Day 3	13	3.48	0.016	1.02
						Day 4	13	2.8	0.03	0.73
						Day 5	13	1	0.32	n.s.
	Figure 1 - Supplement 1
		Panel	Behavioral Metric	N	Test
						Comparison	d.f	test statistic	P - value	hedge's g
		A	Fraction of Licks Correct	14	Paired Sample T-Test, Bonferroni-Holm Correction	Day 1	13	-4.82	0.0017	-1.07
						Day 2	13	-3.13	0.032	-0.92
						Day 3	13	-1.42	0.3	n.s.
						Day 4	13	-2.6	0.065	n.s.
						Day 5	13	-1.54	0.3	n.s.
						Comparison	d.f	test statistic	P - value	hedge's g
		B	Fraction of Licks in Inc. EZ.	14	Paired Sample T-Test, Bonferroni-Holm Correction	Day 1	13	-4.74	0.0019	-1.02
						Day 2	13	-1.92	0.31	n.s.
						Day 3	13	-1.29	0.62	n.s.
						Day 4	13	-1.33	0.62	n.s.
						Day 5	13	0.028	0.79	n.s.
						Comparison	d.f	test statistic	P - value	hedge's g
		C	Lick Rate	14	Paired Sample T-Test, Bonferroni-Holm Correction	Day 1	13	-3.9732	0.0047708	-1.2625
						Day 2	13	-3.9317	0.0047708	-1.3098
						Day 3	13	-4.1626	0.0044591	-0.81693
						Day 4	13	-4.8972	0.0014576	-0.54045
						Day 5	13	-3.3408	0.0053136	-0.49356
						Comparison	d.f	test statistic	P - value	hedge's g
		D	Location Missed Trials	14	Paired Sample T-Test, Bonferroni-Holm Correction	Day 1	13	8.13	9.38e-06	2.08
						Day 2	13	3.18	0.029	0.89
						Day 3	13	2.69	0.055	n.s.
						Day 4	13	2.16	0.099	n.s.
						Day 5	13	1.36	0.2	n.s.
						Comparison	d.f	test statistic	P - value	hedge's g
		E	Percent Time Stopped	14	Paired Sample T-Test, Bonferroni-Holm Correction	Day 1	13	-1.09	0.93	n.s.
						Day 2	13	0.65	1	n.s.
						Day 3	13	1.24	0.93	n.s.
						Day 4	13	2.9	0.06	n.s.
						Day 5	13	0.61	1	n.s.
						Comparison	d.f	test statistic	P - value	hedge's g
		F	Speed	14	Paired Sample T-Test, Bonferroni-Holm Correction	Day 1	13	0.69	0.94	n.s.
						Day 2	13	1.17	0.93	n.s.
						Day 3	13	-0.42	0.94	n.s.
						Day 4	13	-0.88	0.93	n.s.
						Day 5	13	-1.8	0.39	n.s.
						Comparison	d.f.	test statistic	P - value	hedge's g
		G	Performance in New 1 vs New 2	6	paired T-Test, Bonferroni-Holm Correction	Day 1	5	0.48	1	n.s.
						Day 2	5	0.65	1	n.s.
						Day 3	5	-0.94	1	n.s.
						Day 4	5	1.12	1	n.s.
						Day 5	5	-1.41	1	n.s.
			Performance in Fam compared to Fam'			Comparison	d.f	test statistic	P - value	hedge's g
		H	Fam vs Fam'	14	1 sample T-Test, Bonferroni-Holm Correction	Day 1	13	-2.32	0.18	n.s.
						Day 2	13	-0.95	1	n.s.
						Day 3	13	-1.83	0.36	n.s.
						Day 4	13	-0.82	1	n.s.
						Day 5	13	0.47	1	n.s.
						Comparison	d.f	test statistic	P - value	hedge's g
			Fam vs New	14	1 sample T-Test, Bonferroni-Holm Correction	Day 1	13	-6.12	0.00019	-2.22
						Day 2	13	-3.45	0.017	-1.47
						Day 3	13	-0.315	0.023	-1.19
						Day 4	13	-2.91	0.024	-0.82
						Day 5	13	-1.6	0.13	n.s.
						Comparison	d.f	test statistic	P - value	hedge's g
			New vs Fam'	14	1 sample T-Test, Bonferroni-Holm Correction	Day 1	13	5.3	0.00072	1.96
						Day 2	13	2.16	0.2	n.s.
						Day 3	13	1.18	0.27	n.s.
						Day 4	13	1.82	0.27	n.s.
						Day 5	13	1.65	0.27	n.s.
	Figure 1 - Supplement 2		Behavioral Metric	N	Test
		Panel	Track vs Endzone			Comparison	d.f.	test statistic	P-value	hedge's g
			Fam	14	Paired Sample T-Test, Bonferroni-Holm Correction	Day 1	13	-18.96	3.16e-10	-8.8
		A				Day 2	13	-19.21	3.16e-10	-8.91
						Day 3	13	-12.33	4.53e-08	-5.72
						Day 4	13	-10.05	1.69e-07	-4.67
						Day 5	13	-12.1	4.53e-08	-5.62
			Track vs Endzone			Comparison	d.f.	test statistic	P-value	hedge's g
			New	14	Paired Sample T-Test, Bonferroni-Holm Correction	Day 1	13	-4.83	0.00033	-2.24
		B				Day 2	13	-7.72	9.89e-06	-3.58
						Day 3	13	-6.07	7.97e-05	-2.82
						Day 4	13	-9.69	1.3e-06	-4.5
						Day 5	13	-9.46	1.37e-06	-4.39
			Track vs Endzone			Comparison	d.f.	test statistic	P-value	hedge's g
			Fam'	14	Paired Sample T-Test, Bonferroni-Holm Correction	Day 1	13	-12.75	5.02e-08	-5.929
		C				Day 2	13	-8.5	3.43e-06	-3.95
						Day 3	13	-7.5	8.95e-06	-3.48
						Day 4	13	-6.72	1.44e-06	-3.12
						Day 5	13	-9.69	1.03e-06	-4.5
			Time in Endzone			Comparison	d.f.	test statistic	P-value	hedge's g
			Fam vs New	14	Paired Sample T-Test, Bonferroni-Holm Correction	Day 1	13	-9.13	2.54e-06	-2.29
		C				Day 2	13	-6.1	0.00015	-1.89
						Day 3	13	-5.16	0.00055	-1.05
						Day 4	13	-2.08	0.097	n.s.
						Day 5	13	-1.93	0.097	n.s.
			Fam' vs New	14	Paired Sample T-Test, Bonferroni-Holm Correction	Day 1	13	-7.62	1.89e-05	-1.65
						Day 2	13	-2.33	0.15	-0.81
						Day 3	13	-1.8	0.28	-0.42
						Day 4	13	-1.14	0.55	-0.28
						Day 5	13	-0.82	0.55	-0.25
