# Supplementary material for: Structured inhibitory activity dynamics in new virtual environments
Source: eLife journal article supplement (doi:10.7554/elife.47611), 2019-10-08
Supplement: supp [file elife-47611-supp-v1.zip › elife_poa_e47611_Supplementary_file_2.xlsx]

## Sheet: Sheet1
	Figure 2
		Panel	Values Shown	N	Test
						Comparison	d.f.	test statistic	P - value	hedge's g
		E	Mean Percent Change	10	1 sample T-Test, Bonferroni-Holm Correction	Day 1	9	-8.7027	5.6143e-05	-2.752
						Day 2	9	-4.0619	0.011335	-1.2845
						Day 3	9	-1.6857	0.27323	n.s.
						Day 4	9	-0.83094	0.4275	n.s.
						Day 5	9	-1.8918	0.27323	n.s.
						Comparison	d.f.	test statistic	P - value	hedge's g
		F	Normalized Performance	10	1 sample T-Test, Bonferroni-Holm Correction	Day 1	9	-4.3354	0.0018902	-1.371
						Day 2	9	-1.9114	0.088262	n.s.
						Day 3	9	-1.4108	0.19192	n.s.
						Day 4	9	-5.5729	0.00034611	n.s.
						Day 5	9	-2.644	0.026739	n.s.
						Comparison	d.f.	test statistic	P - value	hedge's g
		G	Decel 3s Before Reward	10	Paired Sample T-Test, Bonferroni-Holm Correction	Day 1	9	3.7366	0.02325	1.8072
						Day 2	9	2.1574	0.23726	n.s.
						Day 3	9	1.3045	0.55028	n.s.
						Day 4	9	0.99922	0.55028	n.s.
						Day 5	9	-1.4411	0.55028	n.s.
	Supplement 4: Neuropil Suppression					Comparison	d.f.	test statistic	P - value	hedge's g
		D	Neuropil Percent Change	10	1 sample T-Test, Bonferroni-Holm Correction	Day 1	9	-7.6491	0.00060619	-2.7044
						Day 2	9	-2.9277	0.088385	n.s.
						Day 3	9	-1.2138	0.79254	n.s.
						Day 4	9	-0.66491	1	n.s.
						Day 5	9	-0.28435	1	n.s.
