# Supplementary material for: Structured inhibitory activity dynamics in new virtual environments
Source: eLife journal article supplement (doi:10.7554/elife.47611), 2019-10-08
Supplement: supp [file elife-47611-supp-v1.zip › elife_poa_e47611_Supplementary_file_3.xlsx]

## Sheet: Sheet1
	Figure 3
		Panel	Values Shown	N	Test	Comparison	d.f.	test statistic	P - value	hedge's g
		B	RMS Error Fam_avg vs New	209	Paired Sample T-Test	Day 1	208	13.1268	2.2639e-28	0.95481
						Day 2	208	8.03386	1.3904e-13	0.60483
						Day 3	208	9.71909	4.8054e-18	0.75136
						Day 4	208	9.238	9.007e-17	0.62512
						Day 5	208	7.29394	6.2125e-12	0.49585
		C	Correlation Fam_avg vs New	209	Paired Sample T-Test	Day 1	208	-28.3159	1.3477e-72	-2.1075
						Day 2	208	-18.085	5.9437e-44	-1.3599
						Day 3	208	-13.2574	3.5249e-29	-0.92259
						Day 4	208	-17.4585	3.7598e-42	-1.342
						Day 5	208	-10.4047	1.1106e-20	-0.75054
	Figure 3--Figure supplement 1:
	Behavioral Variables are poorly	A				Comparison	d.f.	test statistic	P - value	hedge's g
	correlated with SOM-int activity in New		Day 1	209	1 sample T-Test, Bonferroni-Holm Correction	Forward	208	-13.5038	1.0382e-28	-1.0191
						Rotation	208	-7.02688	8.893e-10	-0.6932
						Reward	208	-8.79265	1.7831e-14	-0.66916
						Location	208	-1.83517	1	n.s.
						VR Speed	208	-9.91237	1.1025e-17	-0.95594
						Total Accel	208	-7.46672	6.8876e-11	-0.61818
						Forward Accel	208	-9.84893	1.6464e-17	-0.84121
			Day 2	209	1 sample T-Test, Bonferroni-Holm Correction	Forward	208	-2.835	0.10069	n.s.
						Rotation	208	-1.1182	1	n.s.
						Reward	208	0.11201	1	n.s.
						Location	208	-1.2666	1	n.s.
						VR Speed	208	-4.6712	0.000145	-0.44568
						Total Accel	208	-1.107	1	n.s.
						Forward Accel	208	-5.4913	3.3543e-06	-0.39791
			Day 3	209	1 sample T-Test, Bonferroni-Holm Correction	Forward	208	-0.66923	1	n.s.
						Rotation	208	3.6707	0.0073778	0.31045
						Reward	208	4.0273	0.0020557	0.34977
						Location	208	4.0136	0.002086	0.37444
						VR Speed	208	-1.5567	1	n.s.
						Total Accel	208	-0.66368	1	n.s.
						Forward Accel	208	0.72685	1	n.s.
			Day 4	209	1 sample T-Test, Bonferroni-Holm Correction	Forward	208	0.065577	1	n.s.
						Rotation	208	-3.1247	0.044739	-0.3053
						Reward	208	-2.2957	0.43107	n.s.
						Location	208	0.19854	1	n.s.
						VR Speed	208	-0.94727	1	n.s.
						Total Accel	208	-0.20601	1	n.s.
						Forward Accel	208	-4.7041	0.00013002	-0.36646
			Day 5	209	1 sample T-Test, Bonferroni-Holm Correction	Forward	208	3.0319	0.057528	0.18084
						Rotation	208	-0.26666	1	n.s.
						Reward	208	2.0005	0.84151	n.s.
						Location	208	1.8135	1	n.s.
						VR Speed	208	-3.3536	0.0218	-0.34887
						Total Accel	208	1.9456	0.90188	n.s.
						Forward Accel	208	-1.0286	1	n.s.
	Figure 3 - Supplement 2
	SOM-int GLM performance in	Panel	Values Shown	N	Test	Comparison	d.f.	test statistic	P - value	hedge's g
	different environments	B	RMS Error Fam vs New	209	Paired Sample T-Test	Day 1	208	15.5734	4.626e-36	1.4778
						Day 2	208	12.6992	9.8708e-28	1.22
						Day 3	208	14.4399	1.3495e-32	1.2733
						Day 4	208	12.9489	3.2685e-28	1.1694
						Day 5	208	13.1951	8.2942e-29	1.1667
			RMS Error Fam' vs New	209	Paired Sample T-Test	Day 1	208	7.4126	1.5355e-11	0.4377
						Day 2	208	1.4806	0.28043	0.10758
						Day 3	208	3.6185	0.0014884	0.26685
						Day 4	208	2.3392	0.060822	0.1439
						Day 5	208	-0.50801	0.61198	-0.033937
			RMS Error Fam vs Fam'	209	Paired Sample T-Test	Day 1	208	13.6493	5.1776e-30	1.2813
						Day 2	208	9.21462	3.5051e-17	0.87726
						Day 3	208	13.0931	2.31e-28	1.0524
						Day 4	208	10.7557	1.945e-21	0.94271
						Day 5	208	11.5417	1.1609e-23	1.044
		C	Correlation Fam vs New	209	Paired Sample T-Test	Day 1	208	-22.2163	4.0228e-56	-1.8829
						Day 2	208	-17.9345	1.7203e-43	-1.4219
						Day 3	208	-12.0066	2.8337e-25	-0.82807
						Day 4	208	-15.5667	2.9132e-36	-1.2606
						Day 5	208	-11.2795	2.4701e-23	-0.7606
			Correlation Fam' vs New	209	Paired Sample T-Test	Day 1	208	-23.0173	2.1161e-58	-2.0576
						Day 2	208	-19.4982	3.0734e-48	-1.6036
						Day 3	208	-17.4395	4.3022e-42	-1.1229
						Day 4	208	-17.215	1.417e-41	-1.4383
						Day 5	208	-13.0472	8.0416e-29	-0.97993
			Correlation Fam vs Fam'	209	Paired Sample T-Test	Day 1	208	-18.3257	1.3653e-44	-1.4963
						Day 2	208	-8.87105	1.0041e-15	-0.77772
						Day 3	208	-5.69259	4.2219e-08	-0.4508
						Day 4	208	-11.974	7.1493e-25	-0.9789
						Day 5	208	-7.0375	5.575e-11	-0.46778
	Figure 3-figure supplement 4:
	Behavioral Variables
	Poorly Estimate Activity	B	Models Trained in Fam
			Tested in Fam vs New	209	Paired Sample T-Test	All	208	-22.242	6.1092e-56	-1.8647
						Forward	208	-16.176	8.4297e-38	-1.203
						Rotation	208	-7.38846	1.0636e-11	-0.73464
						Reward	208	-9.01966	7.5996e-16	-0.82025
						Location	208	-4.42691	1.5428e-05	-0.43891
						VR Speed	208	-17.7107	1.6748e-42	-1.5049
						Total Accel.	208	-7.76415	1.8355e-12	-0.70341
						Forward Accel	208	-7.75618	1.8355e-12	-0.6381
						Null	208	6.40974	1.9201e-09	0.61787
		D	Models Trained in New
			Tested in Fam vs New	209	Paired Sample T-Test	All	208	-4.64351	1.2131e-05	-0.33153
						Forward	208	-14.4759	2.3389e-32	-1.0125
						Rotation	208	-5.23862	1.1863e-06	-0.50661
						Reward	208	-6.19204	1.561e-08	-0.54067
						Location	208	-4.24392	3.3079e-05	-0.43361
						VR Speed	208	-8.22306	1.4892e-13	-0.66194
						Total Accel.	208	-6.70405	1.1236e-09	-0.5682
						Forward Accel	208	-5.70856	1.5573e-07	-0.44837
						Null	208	-12.5539	2.2461e-26	-1.2244
		E	Models Trained in Fam'
			Tested in Fam vs New	209	Paired Sample T-Test	All	208	-22.8628	1.0416e-57	-1.8168
						Forward	208	-16.3369	2.6513e-38	-1.2007
						Rotation	208	-7.34256	1.3973e-11	-0.72328
						Reward	208	-8.86817	2.0462e-15	-0.81241
						Location	208	-4.54169	9.4462e-06	-0.45089
						VR Speed	208	-17.4939	7.7959e-42	-1.4639
						Total Accel.	208	-8.0171	3.0863e-13	-0.71256
						Forward Accel	208	-8.43231	2.8274e-14	-0.66403
						Null	208	5.69625	8.2884e-08	0.55432
