# Supplementary material for: Structured inhibitory activity dynamics in new virtual environments
Source: eLife journal article supplement (doi:10.7554/elife.47611), 2019-10-08
Supplement: supp [file elife-47611-supp-v1.zip › elife_poa_e47611_Supplementary_file_4.xlsx]

## Sheet: Sheet1
	Figure 4
		Panel	Values Shown	N	Test
						Comparison	d.f.	test statistic	P - value	hedge's g
		C	Mean Percent Change	6	1 sample T-Test, Bonferroni-Holm Correction	Day 1	5	-4.62	0.029	-1.89
						Day 2	5	-3.58	0.063	n.s.
						Day 3	5	-3.84	0.063	n.s.
						Day 4	5	-2.96	0.063	n.s.
						Day 5	5	-2.84	0.063	n.s.
						Comparison	d.f.	test statistic	P - value	hedge's g
		D	Normalized Performance	6	1 sample T-Test, Bonferroni-Holm Correction	Day 1	5	-4.37	0.029	-1.78
						Day 2	5	-5.24	0.017	-2.14
						Day 3	5	-4.06	0.046	-1.82
						Day 4	5	-3.58	0.046	-1.46
						Day 5	5	-2.22	0.077	n.s.
						Comparison	d.f.	test statistic	P - value	hedge's g
		E	Decel 3s Before Reward	6	Paired Sample T-Test, Bonferroni-Holm Correction	Day 1	5	2.7	0.217	n.s.
						Day 2	5	2.45	0.217	n.s.
						Day 3	5	1.6	0.217	n.s.
						Day 4	5	2.01	0.217	n.s.
						Day 5	5	2.62	0.156	n.s.
			Values Shown	N	Test	Comparison	d.f.	test statistic	P - value	hedge's g
		G	RMS Error Fam_avg vs New	172	Paired Sample T-Test	Day 1	171	10.6589	4.6234e-20	0.86616
						Day 2	171	7.45354	1.2987e-11	0.59873
						Day 3	151	11.0052	2.3557e-20	0.86959
						Day 4	171	1.65534	0.09969	n.s.
						Day 5	171	4.63083	1.4362e-05	0.35496
		H	Correlation Fam_avg vs New	172	Paired Sample T-Test	Day 1	171	-23.0798	1.0329e-53	-1.6564
						Day 2	171	-17.663	6.3162e-40	-1.1158
						Day 3	151	-19.2431	7.241e-42	-1.3905
						Day 4	171	-13.7628	1.7256e-29	-1.0102
						Day 5	171	-14.2169	1.7578e-30	-1.0869
	Figure 4-figure supplement 3:					Comparison	d.f.	test statistic	P - value	hedge's g
	Neuropil Suppression	D	Neuropil Percent Change	6	1 sample T-Test, Bonferroni-Holm Correction	Day 1	5	-6.0015	0.018658	-2.684
						Day 2	5	-3.3845	0.055341	-1.5136
						Day 3	5	-5.3384	0.018658	-2.3874
						Day 4	5	-6.0652	0.018658	-2.7125
						Day 5	5	-2.4129	0.073326	n.s.
	Figure 4-figure supplement 4:	A				Comparison	d.f.	test statistic	P - value	hedge's g
	Behavioral variables are poorly		Day 1	172	1 sample T-Test, Bonferroni-Holm Correction	Forward	171	-12.0575	4.4421e-23	-1.0508
	correlated with PV-int activity in New					Rotation	171	-2.94031	0.059725	n.s.
						Reward	171	-4.79818	8.3306e-05	-0.39573
						Location	171	-3.4763	0.012775	-0.36065
						VR Speed	171	-4.93884	4.646e-05	-0.53166
						Total Accel	171	-4.76407	9.2721e-05	-0.49104
						Forward Accel	171	-11.0504	3.1098e-20	-0.98786
			Day 2	172	1 sample T-Test, Bonferroni-Holm Correction	Forward	171	-5.1363	1.9688e-05	-0.35464
						Rotation	171	-0.053026	1	n.s.
						Reward	171	-0.37044	1	n.s.
						Location	171	1.0548	1	n.s.
						VR Speed	171	-1.3754	1	n.s.
						Total Accel	171	0.030681	1	n.s.
						Forward Accel	171	-6.2545	9.269e-08	-0.38631
			Day 3	172	1 sample T-Test, Bonferroni-Holm Correction	Forward	171	-6.3377	6.1984e-08	-0.41107
						Rotation	171	-5.7788	9.4116e-07	-0.45319
						Reward	171	-0.13346	1	n.s.
						Location	171	-1.6248	1	n.s.
						VR Speed	171	-1.584	1	n.s.
						Total Accel	171	-0.62647	1	n.s.
						Forward Accel	171	-7.9808	6.6596e-12	-0.49959
			Day 4	172	1 sample T-Test, Bonferroni-Holm Correction	Forward	171	-5.8752	6.0295e-07	-0.39476
						Rotation	171	2.8967	0.063973	n.s.
						Reward	171	3.0706	0.042255	0.21996
						Location	171	4.504	0.00027076	0.42549
						VR Speed	171	-3.4789	0.012775	-0.35666
						Total Accel	171	-2.589	0.1359	n.s.
						Forward Accel	171	-1.647	1	n.s.
			Day 5	172	1 sample T-Test, Bonferroni-Holm Correction	Forward	171	-6.6702	1.0871e-08	-0.51956
						Rotation	171	3.7276	0.0055122	0.42055
						Reward	171	3.2859	0.022204	0.23901
						Location	171	6.0352	2.7774e-07	0.62288
						VR Speed	171	-1.6528	1	n.s.
						Total Accel	171	-2.7435	0.09419	n.s.
						Forward Accel	171	-1.9266	0.66829	n.s.
	Figure 4-figure supplement 5:
	GLM performance	Panel	Values Shown	N	Test	Comparison	d.f.	test statistic	P - value	hedge's g
		A	RMS Error Fam vs New	172	Paired Sample T-Test	Day 1	171	16.0498	2.3808e-35	1.7391
						Day 2	171	13.0138	7.1031e-27	1.3291
						Day 3	171	19.3506	3.113e-44	1.935
						Day 4	171	10.9071	2.3191e-21	1.0839
						Day 5	171	12.2968	5.2776e-25	1.2063
			RMS Error Fam' vs New	172	Paired Sample T-Test	Day 1	171	5.6119	2.613e-07	0.35788
						Day 2	171	5.6553	2.613e-07	0.34064
						Day 3	171	5.6969	2.613e-07	0.36724
						Day 4	171	-2.4411	0.03132	-0.13749
						Day 5	171	-0.91429	0.36185	n.s.
			RMS Error Fam vs Fam'	172	Paired Sample T-Test	Day 1	171	16.8713	1.2489e-37	1.8174
						Day 2	171	12.8598	1.3037e-26	1.3115
						Day 3	171	17.0725	4.3551e-38	1.6577
						Day 4	171	12.9572	1.0306e-26	1.2501
						Day 5	171	12.7115	1.7293e-26	1.3266
							d.f.	test statistic	P - value	hedge's g
		B	Correlation Fam vs New	172	Paired Sample T-Test	Day 1	171	-21.1232	7.8264e-49	-2.0291
						Day 2	171	-12.946	3.6982e-27	-1.2127
						Day 3	171	-19.4144	1.6899e-44	-1.917
						Day 4	171	-14.2851	1.1245e-30	-1.0616
						Day 5	171	-14.394	8.2769e-31	-1.1662
			Correlation Fam' vs New	172	Paired Sample T-Test	Day 1	171	-11.2128	1.2724e-21	-1.12
						Day 2	171	-8.32463	7.8116e-14	-0.79285
						Day 3	171	-12.738	7.2612e-26	-0.9159
						Day 4	171	-5.35083	2.781e-07	-0.32738
						Day 5	171	-7.55538	4.8251e-12	-0.60838
			Correlation Fam vs Fam'	172	Paired Sample T-Test	Day 1	171	-17.0276	5.7876e-38	-0.8093
						Day 2	171	-8.76103	3.6899e-15	-0.40155
						Day 3	171	-12.0439	4.1629e-24	-0.91126
						Day 4	171	-12.6892	8.0065e-26	-0.67022
						Day 5	171	-8.15025	7.3888e-14	-0.40556
	Figure 4-figure supplement 6:
	Behavioral Variables
	Poorly Estimate Activity	B	Models Trained in Fam
			Tested in Fam vs New	172	Paired Sample T-Test	All	171	-17.2091	3.3029e-38	-1.6668
						Forward	171	-12.4374	7.3348e-25	-1.1623
						Rotation	171	-2.4774	0.028412	-0.24013
						Reward	171	-7.54347	1.5502e-11	-0.73293
						Location	171	-2.40021	0.028412	-0.21385
						VR Speed	171	-15.4521	2.2519e-33	-1.6352
						Total Accel.	171	-7.45767	2.114e-11	-0.74224
						Forward Accel	171	-6.30471	9.5066e-09	-0.64365
						Null	171	5.19952	1.6959e-06	0.55933
		D	Models Trained in New
			Tested in Fam vs New	172	Paired Sample T-Test	All	171	-2.02282	0.089298	n.s.
						Forward	171	-11.1435	4.4944e-21	-1.021
						Rotation	171	-0.591462	0.55499	n.s.
						Reward	171	-5.58038	3.698e-07	-0.49245
						Location	171	-2.39726	0.052788	n.s.
						VR Speed	171	-7.43232	3.4213e-11	-0.75532
						Total Accel.	171	-6.0713	3.9816e-08	-0.53984
						Forward Accel	171	-6.66758	2.0673e-09	-0.63184
						Null	171	-8.6617	2.7082e-14	-0.93224
		E	Models Trained in Fam'
			Tested in Fam vs New	172	Paired Sample T-Test	All	171	-14.9983	4.2828e-32	-1.5204
						Forward	171	-12.5799	2.8746e-25	-1.1781
						Rotation	171	-2.36741	0.038061	-0.23133
						Reward	171	-7.55641	1.3946e-11	-0.71777
						Location	171	-2.19804	0.038061	-0.19818
						VR Speed	171	-15.1841	1.4409e-32	-1.6008
						Total Accel.	171	-7.56184	1.3946e-11	-0.75421
						Forward Accel	171	-6.59141	2.0774e-09	-0.67524
						Null	171	3.6444	0.0010658	0.39454
