# Supplementary material for: Structured inhibitory activity dynamics in new virtual environments
Source: eLife journal article supplement (doi:10.7554/elife.47611), 2019-10-08
Supplement: supp [file elife-47611-supp-v1.zip › elife_poa_e47611_Supplementary_file_5.xlsx]

## Sheet: Sheet1
	Figure 5
		Panel	Values Shown	N	Test
						Comparison	d.f.	test statistic	P - value	hedge's g
		E	Mean Percent Change	6	1 sample T-Test, Bonferroni-Holm Correction	Day 1	5	-6.49	0.0017	-2.3
						Day 2	5	-5	0.0047	-1.77
						Day 3	5	-6.27	0.0017	-2.22
						Day 4	5	-3.92	0.011	-1.39
						Day 5	5	-3.38	0.015	-1.28
						Comparison	d.f.	test statistic	P - value	hedge's g
		F	Normalized Speed	6	1 sample T-Test, Bonferroni-Holm Correction	Day 1	5	4.63	0.028	1.89
						Day 2	5	3.21	0.094	n.s.
						Day 3	5	3.27	0.094	n.s.
						Day 4	5	3.15	0.094	n.s.
						Day 5	5	3.11	0.094	n.s.
						Comparison	d.f.	test statistic	P - value	hedge's g
	Supplement 2:	B	Mean Short-Time Correlation	6	2 sample T-Test Bonferroni-Holm Correction	Day 1	5	-4.9286	0.021825	-1.0049
	Population Coordination		Fam_Ave vs New			Day 2	5	-1.6617	0.62987	n.s.
						Day 3	5	-0.97287	1.1259	n.s.
						Day 4	5	-0.32037	1.1259	n.s.
						Day 5	5	0.74992	1.1259	n.s.
		D	Fam_Ave vs No Task	6	2 sample T-Test Bonferroni-Holm Correction	Day 1	5	-5.3201	0.0157	-1.397
						Day 2	5	-3.2688	0.043559	-1.0579
						Day 3	5	-4.5982	0.017615	-2.2612
						Day 4	5	-4.9184	0.017615	-1.7782
						Day 5	5	-3.6496	0.043559	-1.6575
		E	PV Fam_Ave vs New	6	2 sample T-Test Bonferroni-Holm Correction	Day 1	5	-6.3901	0.006951	-2.8097
						Day 2	5	-4.4955	0.025705	-1.5965
						Day 3	5	-4.0198	0.031734	-0.89011
						Day 4	5	-4.3769	0.025705	-0.89942
						Day 5	5	-3.0583	0.031734	-0.65921
