# Supplementary material for: Structured inhibitory activity dynamics in new virtual environments
Source: eLife journal article supplement (doi:10.7554/elife.47611), 2019-10-08
Supplement: supp [file elife-47611-supp-v1.zip › elife_poa_e47611_Supplementary_file_6.xlsx]

## Sheet: Sheet1
	Figure 6
		Panel	Values Shown	N	Test
						Comparison	P - value	R
		A	Correlation in Percent Change New 1 vs New 2	116	Pearon's Correlation, Bonferroni-Holm Correction	Day 1	4.14e-16	0.67
						Day 2	3.13e-15	0.66
						Day 3	1.05e-19	0.73
						Day 4	1.37e-14	0.64
						Day 5	3.31e-14	0.63
						Comparison	P - value	R
		B	Correlation in Percent Change New 1 vs No Task	116	Pearon's Correlation, Bonferroni-Holm Correction	Day 1	7.9e-08	0.5
						Day 2	0.056	0.23
						Day 3	0.58	0.1
						Day 4	0.48	0.13
						Day 5	0.58	-0.085
						Comparison	d.f.	test statistic	P - value	hedge's g
		D	Mean Difference in Cell Cell Correlation New 1 vs New 2	116	1 sample T-Test, Bonferroni-Holm Correction	Day 1	115	2.3	0.092	n.s.
						Day 2	115	-0.53	0.63	n.s.
						Day 3	115	1.33	0.55	n.s.
						Day 4	115	3.51	0.003	0.33
						Day 5	115	-1	0.63	n.s.
						Comparison	d.f.	test statistic	P - value	hedge's g
			Mean Difference in Cell Cell Correlation New 1 vs No Task	116	1 sample T-Test, Bonferroni-Holm Correction	Day 1	115	4.59	2.24e-05	0.43
						Day 2	115	3.69	0.00035	0.34
						Day 3	115	6.83	1.71e-09	0.63
						Day 4	115	8.1	3.3e-13	0.75
						Day 5	115	6.29	2.37e-08	0.62
	Figure 6-figure supplement 1					Rho	P-value
	Characterization of suppressed	C	Anatomical Layer	209	Ranksum, Bonferroni-Holm Correction		0.38
	SOM-ints	D	Brightness	209	Spearman Rank Correlation, Bonferroni-Holm Correction	-0.218	0.0553
		E	Cell Size	209	Spearman Rank Correlation, Bonferroni-Holm Correction	0.609	1
		F	Phase Angle	209	Spearman Rank Correlation, Bonferroni-Holm Correction	-0.0437	1
		G	Model Error	209	Spearman Rank Correlation, Bonferroni-Holm Correction	-0.164	0.258
		H	Model Correlation	209	Spearman Rank Correlation, Bonferroni-Holm Correction	0.0398	1
		I	Percent Change Differnce vs Cell-Cell Distance	1793	Spearman Rank Correlation, Bonferroni-Holm Correction	-0.01	1
		J	Cell-Cell Corr vs Cell-Cell Distance	1793	Spearman Rank Correlation, Bonferroni-Holm Correction	-0.1	1.32e-06
						Rho	P-value
	Figure 6-figure supplement 2:	D	Cell-Cell Correlation in New vs Cell-Cell Correlation in Fam	1036	Spearman Rank Correlation, Bonferroni-Holm Correction	0.46	0
	SOM-int network activity structure	E	Cell-Cell Correlation in No Task vs Cell-Cell Correlation in Fam	1036	Spearman Rank Correlation, Bonferroni-Holm Correction	0.36	0
	is stable across environments	F	Cell-Cell Correlation in New 1 vs Cell-Cell Correlation in New 2	1036	Spearman Rank Correlation, Bonferroni-Holm Correction	0.62	0
		G	Cell-Cell Correlation in New vs Cell-Cell Correlation in No Task	1036	Spearman Rank Correlation, Bonferroni-Holm Correction	0.55	0
		H	Cell-Cell Correlation in Fam vs Difference in Percent Change Pairs	1036	Spearman Rank Correlation, Bonferroni-Holm Correction	0.32	0
		I	Cell-Cell Correlation in Fam vs Mean Percent Change	1036	Spearman Rank Correlation, Bonferroni-Holm Correction	0.21	8.25e-12
						Rho	P-value
	Figure 6-figure supplement 3:	A	Cell-Cell Correlation in Fam Day 1 vs Day 2	1036	Spearman Rank Correlation, Bonferroni-Holm Correction	0.54	0
	SOM-int network activity		Cell-Cell Correlation in Fam Day 1 vs Day 3	1036	Spearman Rank Correlation, Bonferroni-Holm Correction	0.49	0
	structure is stable across days in		Cell-Cell Correlation in Fam Day 1 vs Day 4	1036	Spearman Rank Correlation, Bonferroni-Holm Correction	0.48	0
	the same environment		Cell-Cell Correlation in Fam Day 1 vs Day 5	1036	Spearman Rank Correlation, Bonferroni-Holm Correction	0.54	0
		B	Cell-Cell Correlation in New Day 1 vs Day 2	1036	Spearman Rank Correlation, Bonferroni-Holm Correction	0.46	0
			Cell-Cell Correlation in New Day 1 vs Day 3	1036	Spearman Rank Correlation, Bonferroni-Holm Correction	0.56	0
			Cell-Cell Correlation in New Day 1 vs Day 4	1036	Spearman Rank Correlation, Bonferroni-Holm Correction	0.47	0
			Cell-Cell Correlation in New Day 1 vs Day 5	1036	Spearman Rank Correlation, Bonferroni-Holm Correction	0.46	0
		C	Cell-Cell Correlation in No Task Day 1 vs Day 2	1036	Spearman Rank Correlation, Bonferroni-Holm Correction	0.44	0
			Cell-Cell Correlation in No Task Day 1 vs Day 3	1036	Spearman Rank Correlation, Bonferroni-Holm Correction	0.54	0
			Cell-Cell Correlation in No Task Day 1 vs Day 4	1036	Spearman Rank Correlation, Bonferroni-Holm Correction	0.49	0
			Cell-Cell Correlation in No Task Day 1 vs Day 5	1036	Spearman Rank Correlation, Bonferroni-Holm Correction	0.49	0
