# Supplementary figures and images for: Structured inhibitory activity dynamics in new virtual environments
Source: eLife journal article supplement (doi:10.7554/elife.47611), 2019-10-08

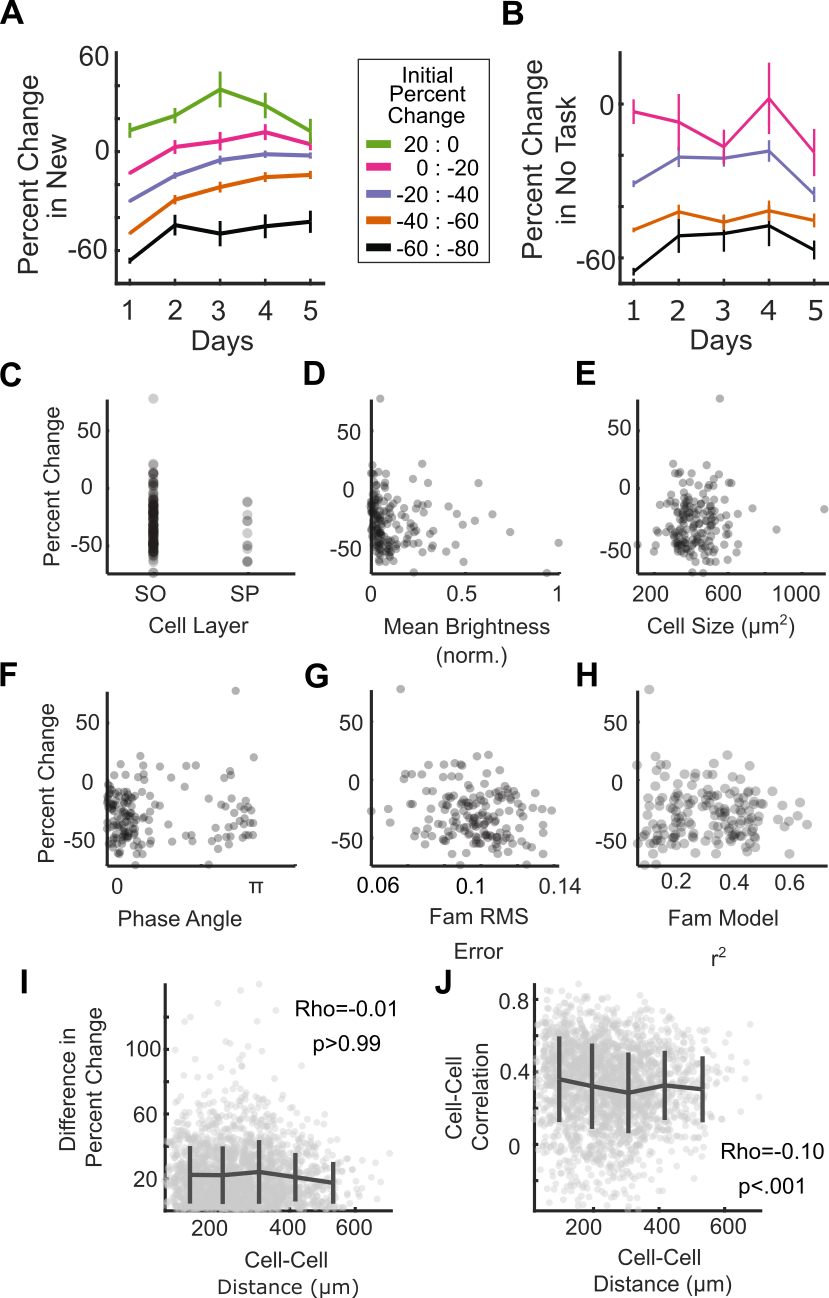

Supplement: supp [file elife-47611-supp-v1.zip › elife_poa_e47611_Figure_6_figure_supplement_1.tif]

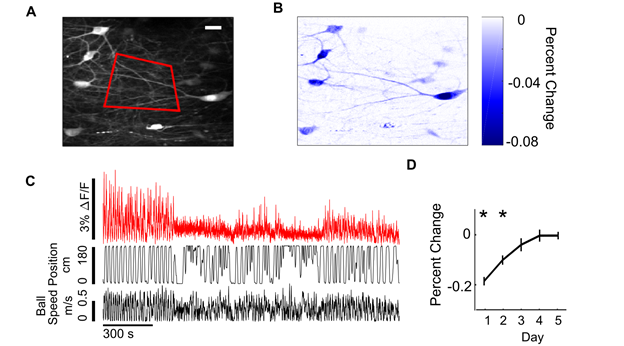

Supplement: supp [file elife-47611-supp-v1.zip › elife_poa_e47611_Figure_2_figure_supplement_4.tif]

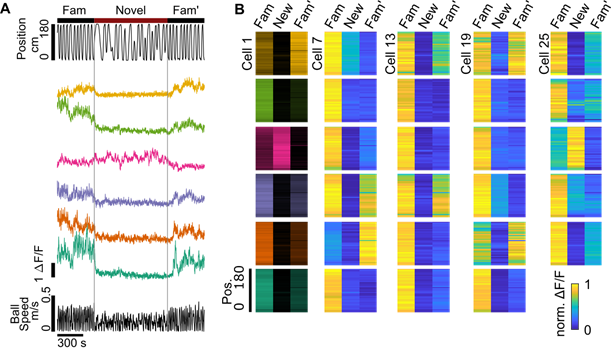

Supplement: supp [file elife-47611-supp-v1.zip › elife_poa_e47611_Figure_4_figure_supplement_2.tif]

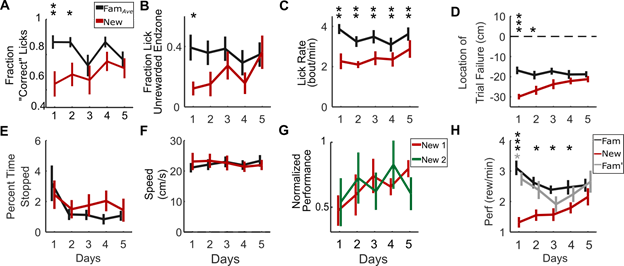

Supplement: supp [file elife-47611-supp-v1.zip › elife_poa_e47611_Figure_1_figure_supplement_1.tif]

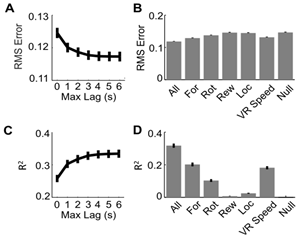

Supplement: supp [file elife-47611-supp-v1.zip › elife_poa_e47611_Figure_3_figure_supplement_3.tif]

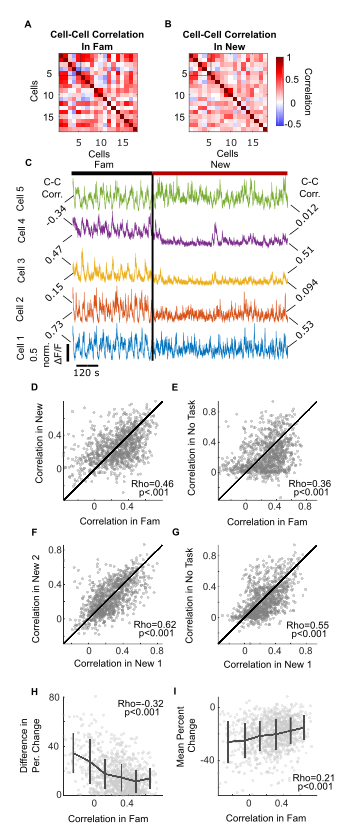

Supplement: supp [file elife-47611-supp-v1.zip › elife_poa_e47611_Figure_6_figure_supplement_2.tif]

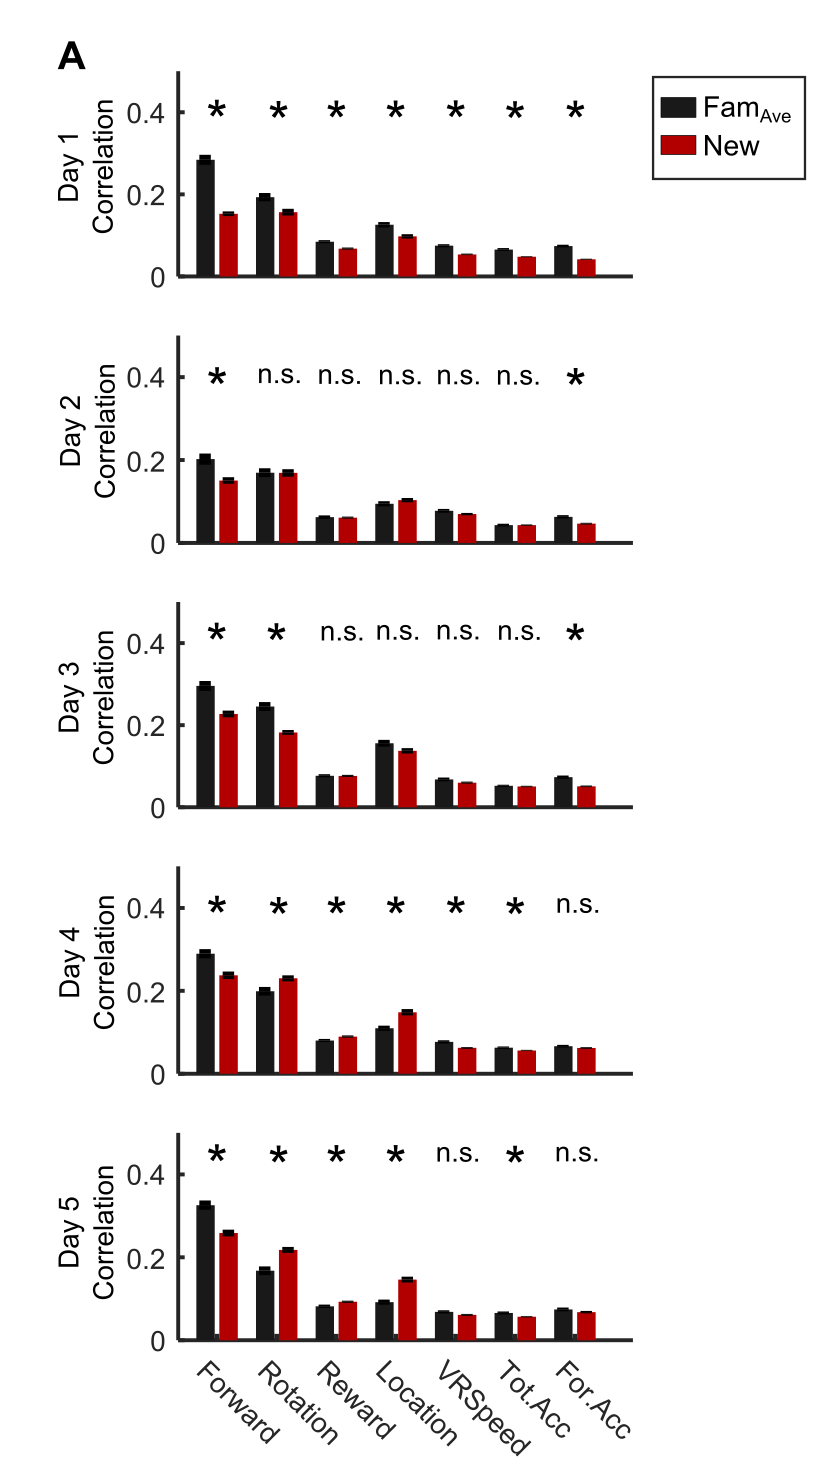

Supplement: supp [file elife-47611-supp-v1.zip › elife_poa_e47611_Figure_4_figure_supplement_4.tif]

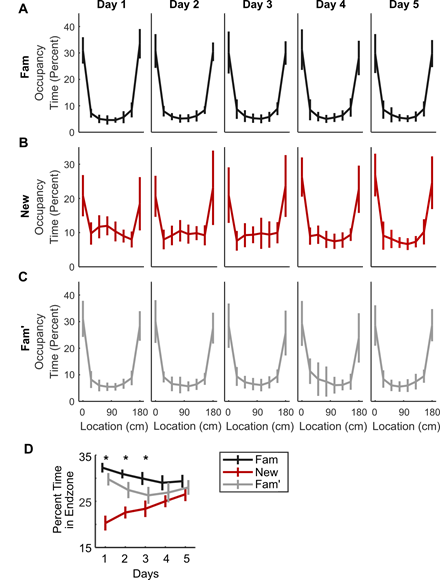

Supplement: supp [file elife-47611-supp-v1.zip › elife_poa_e47611_Figure_1_figure_supplement_2.tif]

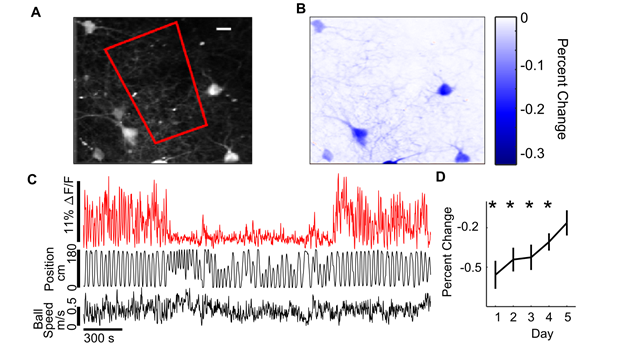

Supplement: supp [file elife-47611-supp-v1.zip › elife_poa_e47611_Figure_4_figure_supplement_3.tif]

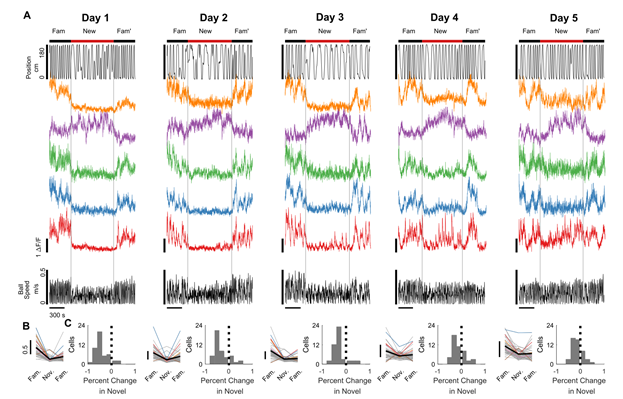

Supplement: supp [file elife-47611-supp-v1.zip › elife_poa_e47611_Figure_4_figure_supplement_1.tif]

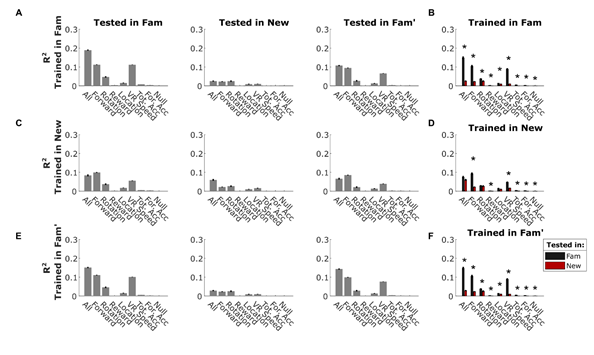

Supplement: supp [file elife-47611-supp-v1.zip › elife_poa_e47611_Figure_4_figure_supplement_6.tif]

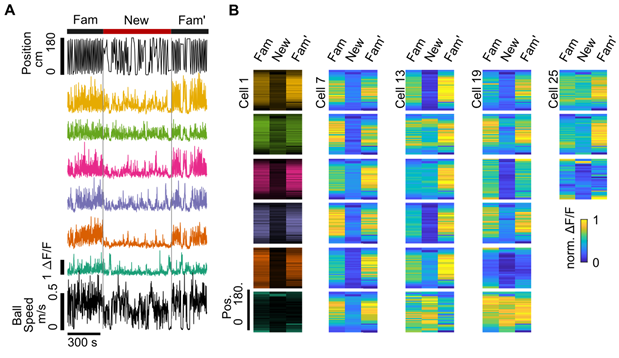

Supplement: supp [file elife-47611-supp-v1.zip › elife_poa_e47611_Figure_2_figure_supplement_3.tif]

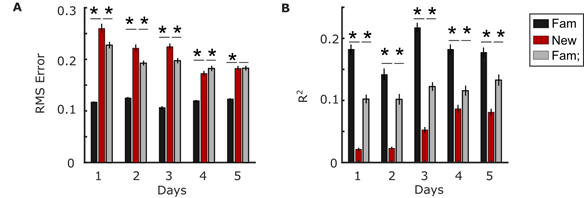

Supplement: supp [file elife-47611-supp-v1.zip › elife_poa_e47611_Figure_4_figure_supplement_5.tif]

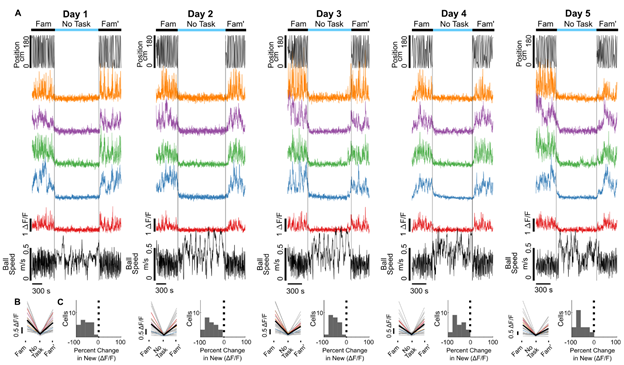

Supplement: supp [file elife-47611-supp-v1.zip › elife_poa_e47611_Figure_5_figure_supplement_1.tif]

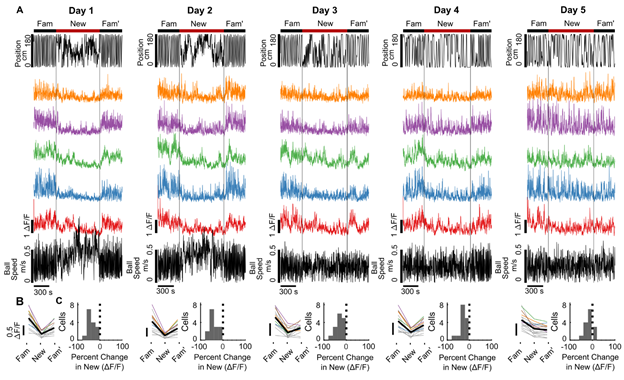

Supplement: supp [file elife-47611-supp-v1.zip › elife_poa_e47611_Figure_2_figure_supplement_2.tif]

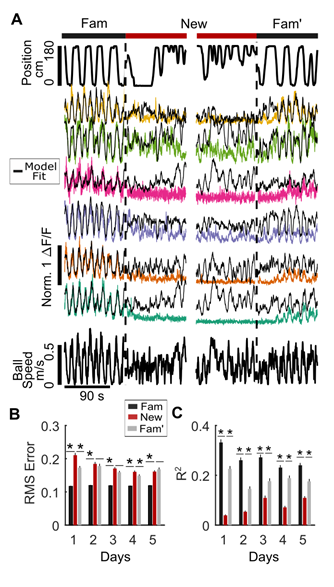

Supplement: supp [file elife-47611-supp-v1.zip › elife_poa_e47611_Figure_3_figure_supplement_2.tif]

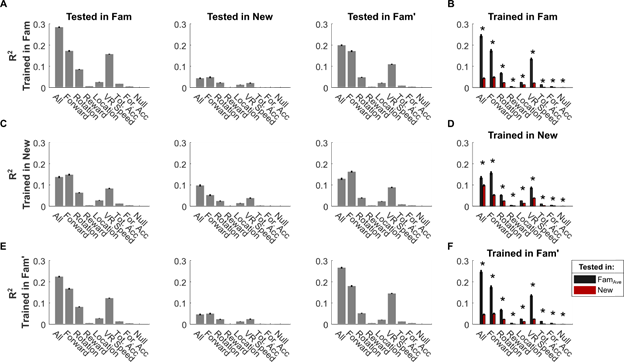

Supplement: supp [file elife-47611-supp-v1.zip › elife_poa_e47611_Figure_3_figure_supplement_4.tif]

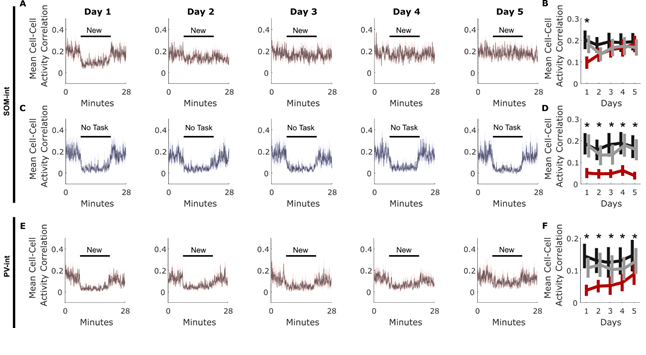

Supplement: supp [file elife-47611-supp-v1.zip › elife_poa_e47611_Figure_5_figure_supplement_2.tif]

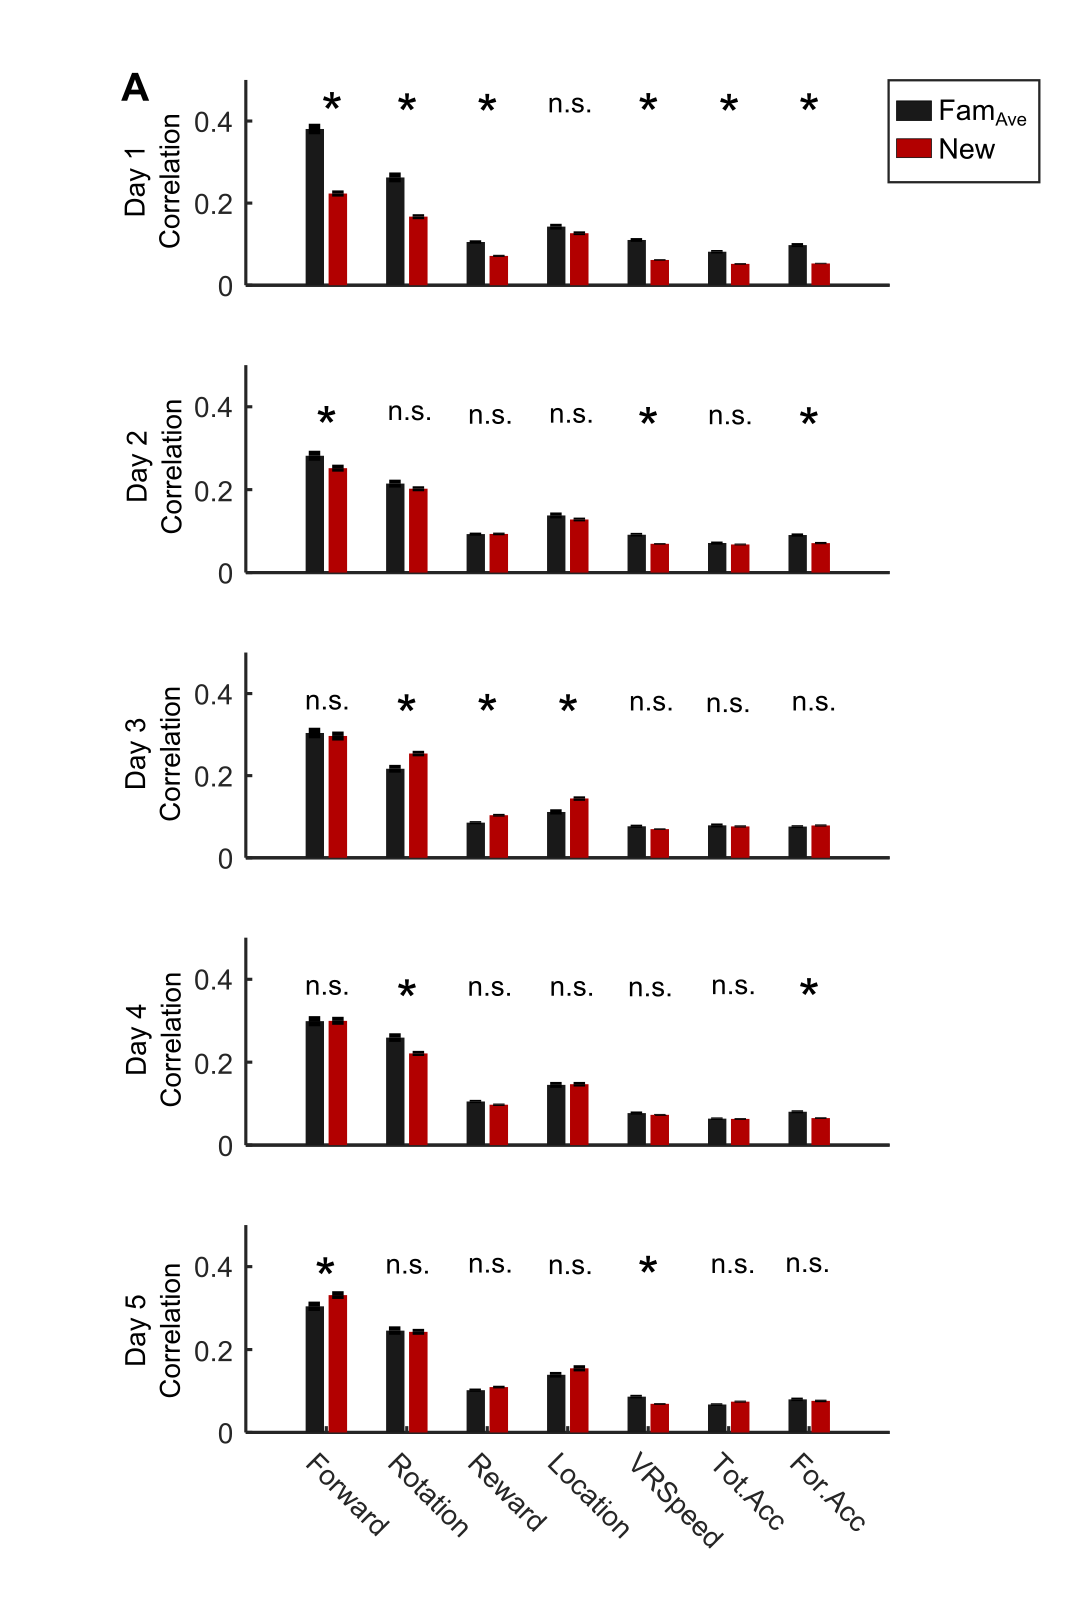

Supplement: supp [file elife-47611-supp-v1.zip › elife_poa_e47611_Figure_3_figure_supplement_1.tif]

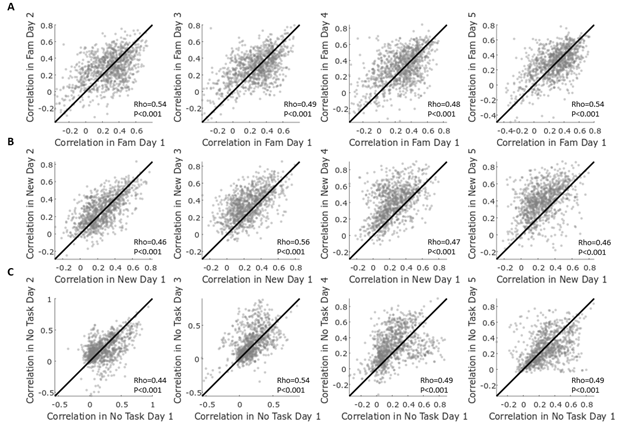

Supplement: supp [file elife-47611-supp-v1.zip › elife_poa_e47611_Figure_6_figure_supplement_3.tif]

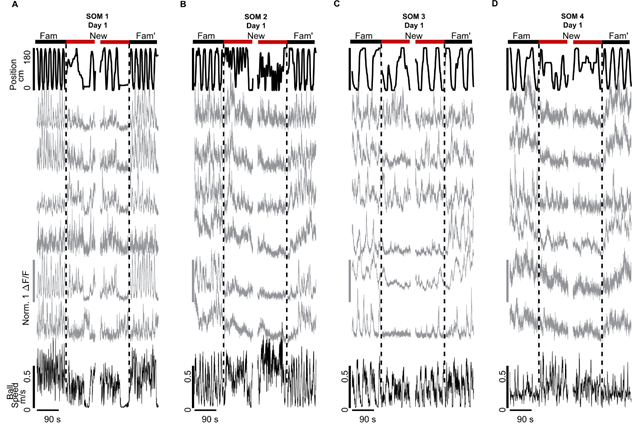

Supplement: supp [file elife-47611-supp-v1.zip › elife_poa_e47611_Figure_2_figure_supplement_1.tif]
